# Supplementary material for: Empagliflozin as Add-on to Metformin Plus Sulfonylurea in Patients With Type 2 Diabetes: A 24-week, randomized, double-blind, placebo-controlled trial
Source: PubMed Central journal article supplement — Diabetes Care. 2013 Oct 15;36(11):3396–404. doi: 10.2337/dc12-2673 (PMC3816918; doi:10.2337/dc12-2673), 2013-10-15

**Supplementary Section 1. Methods: Statistical analysis**

In the primary analysis, each empagliflozin dose was to be compared to placebo at the significance level of 0.025. A sample of 205 patients per randomized treatment group was required to ensure a power of 95% for the pairwise comparison and an overall power of  $\geq 90\%$  to detect a 0.5% treatment difference in HbA<sub>1c</sub> for each empagliflozin dose compared to placebo, assuming a standard deviation of 1.2% and a 15% drop-out rate.

MMRM analyses were performed in the FAS using OC and included the fixed effects of randomized treatment, region, baseline eGFR, visit and treatment-by-visit interaction, as well as continuous baseline HbA<sub>1c</sub>. For FPG and blood pressure, the MMRM analysis included the baseline value for the endpoint in question as an additional linear covariate.

Subgroup analysis of HbA<sub>1c</sub> change from baseline by renal impairment categories was performed by including a treatment-by-baseline eGFR interaction term in the model described for the primary endpoint.

The models of the logistic regression of categorical change in HbA<sub>1c</sub> and the proportion of patients with  $>5\%$  weight loss included baseline HbA<sub>1c</sub>, treatment, region and baseline eGFR (and baseline weight for the responder analysis of weight).

Analyses of MDG, FPG, and PPG were performed using the parameter in mg/dL. For presentation in this manuscript, estimates from the statistical analyses were converted to mmol/L using a factor of 0.0555.

**Supplementary Section 2. Results: FPG and 2-hour PPG**

Changes in FPG over time are shown in Supplementary Figure 1B. After 24 weeks' treatment, adjusted mean (SE) changes from baseline were 0.31 (0.11) mmol/L with placebo compared with -1.29 (0.11) mmol/L with empagliflozin 10 mg and 25 mg (differences of adjusted means versus placebo were -1.60 mmol/L [95% CI -1.90, -1.30] for empagliflozin 10 mg and -1.60 mmol/L [95% CI -1.90, -1.29] for empagliflozin 25 mg;  $p < 0.001$  for both doses; Supplementary Figure 1C, Supplementary Table 1). Compared with placebo, at week 24 there was a significant reduction in 2-hour PPG with both doses: adjusted mean (SE) changes from baseline were -0.13 (0.46) mmol/L with placebo compared with -1.98 (0.41) mmol/L with empagliflozin 10 mg and -2.03 (0.40) mmol/L with empagliflozin 25 mg (differences of adjusted means versus placebo were -1.86 mmol/L [95% CI -3.07, -0.65] for empagliflozin 10 mg and -1.90 mmol/L [95% CI -3.12, -0.68] for empagliflozin 25 mg;  $p = 0.003$  for both doses; Supplementary Figure 1D, Supplementary Table 1).

SUPPLEMENTARY DATA

**Supplementary Table 1.** Changes in HbA<sub>1c</sub> and plasma glucose.

|                                                                                                            | Placebo         | Empagliflozin<br>10 mg | Empagliflozin<br>25 mg | Open-label<br>empagliflozin 25 mg<br>(baseline HbA <sub>1c</sub><br>>10%) |
|------------------------------------------------------------------------------------------------------------|-----------------|------------------------|------------------------|---------------------------------------------------------------------------|
| <b>Primary endpoint</b>                                                                                    |                 |                        |                        |                                                                           |
| HbA <sub>1c</sub> at week 24 (%)                                                                           | 7.97<br>(0.07)  | 7.26 (0.05)            | 7.33 (0.06)            | 8.20 (0.14)                                                               |
| Change from baseline in<br>HbA <sub>1c</sub> (%)                                                           | -0.17<br>(0.05) | -0.82 (0.05)           | -0.77 (0.05)           | -2.89 (0.16)                                                              |
| Difference vs. placebo                                                                                     |                 | -0.64 (0.07)           | -0.59 (0.07)           |                                                                           |
| 95% CI                                                                                                     |                 | -0.77, -0.51           | -0.73, -0.46           |                                                                           |
| p-value                                                                                                    |                 | <0.001                 | <0.001                 |                                                                           |
| <b>Key secondary endpoint</b>                                                                              |                 |                        |                        |                                                                           |
| MDG at week 24<br>(mmol/L)                                                                                 | 9.49<br>(0.14)  | 8.91 (0.15)            | 8.81 (0.17)            | 9.51 (0.38)                                                               |
| Change from baseline in<br>MDG (mmol/L)                                                                    | 0.00<br>(0.10)  | -0.56 (0.10)           | -0.72 (0.11)           | -3.39 (0.58)                                                              |
| Difference vs. placebo                                                                                     |                 | -0.56 (0.14)           | -0.72 (0.15)           |                                                                           |
| 95% CI                                                                                                     |                 | -0.83, -0.28           | -1.02, -0.43           |                                                                           |
| p-value                                                                                                    |                 | <0.001                 | <0.001                 |                                                                           |
| <b>Exploratory endpoints</b>                                                                               |                 |                        |                        |                                                                           |
| Patients with HbA <sub>1c</sub><br>≥7.0% at baseline* who<br>reached HbA <sub>1c</sub> <7.0% at<br>week 24 | 20 (9.3)        | 55 (26.3)              | 65 (32.2)              | 9 (8.9)                                                                   |
| Odds ratio vs. placebo                                                                                     |                 | 3.85                   | 5.22                   |                                                                           |
| 95% CI                                                                                                     |                 | 2.17, 6.85             | 2.95, 9.24             |                                                                           |
| p-value                                                                                                    |                 | <0.001                 | <0.001                 |                                                                           |
| FPG at week 24 (mmol/L)                                                                                    | 8.78<br>(0.16)  | 7.13 (0.11)            | 7.29 (0.12)            | 7.83 (0.30)                                                               |
| Change from baseline in<br>FPG (mmol/L)                                                                    | 0.31<br>(0.11)  | -1.29 (0.11)           | -1.29 (0.11)           | -3.02 (0.37)                                                              |
| Difference vs. placebo                                                                                     |                 | -1.60 (0.15)           | -1.60 (0.16)           |                                                                           |
| 95% CI                                                                                                     |                 | -1.90, -1.30           | -1.90, -1.29           |                                                                           |
| p-value                                                                                                    |                 | <0.001                 | <0.001                 |                                                                           |
| 2-hour PPG at week 24<br>(mmol/L) <sup>†</sup>                                                             | 16.16<br>(0.57) | 14.41 (0.64)           | 13.82 (0.50)           | NM                                                                        |
| Change from baseline<br>(mmol/L)                                                                           | -0.13<br>(0.46) | -1.98 (0.41)           | -2.03 (0.40)           | NM                                                                        |
| Difference vs. placebo                                                                                     |                 | -1.86 (0.61)           | -1.90 (0.62)           |                                                                           |
| 95% CI                                                                                                     |                 | -3.07, -0.65           | -3.12, -0.68           |                                                                           |
| p-value                                                                                                    |                 | 0.003                  | 0.003                  |                                                                           |

Data are n (%) or mean (SE) except for change from baseline values in randomized groups, which are adjusted mean (SE). Values are from the full analysis set (FAS) using last observation carried forward (LOCF) and from the open-label set using observed cases (OC). HbA<sub>1c</sub> <7.0% at week 24 analyzed in the FAS using non-completers considered failures

SUPPLEMENTARY DATA

approach. CI=confidence interval; NM=not measured. \*n=216 for placebo, n=209 for empagliflozin 10 mg, n=202 for empagliflozin 25 mg, n=101 for open-label group. †2-hour PPG was evaluated in a subset of 125 randomized patients who had a valid MTT (n=35 for placebo, n=43 for empagliflozin 10 mg, n=46 for empagliflozin 25 mg) using LOCF.

**Supplementary Table 2.** Changes from baseline in HbA<sub>1c</sub> in renal function subgroups.

|                                                                   | Placebo      | Empagliflozin 10 mg | Empagliflozin 25 mg |
|-------------------------------------------------------------------|--------------|---------------------|---------------------|
| Patients with eGFR $\geq$ 90 ml/min/1.73m <sup>2</sup> , n        | 94           | 92                  | 94                  |
| Change from baseline in HbA <sub>1c</sub> (%)                     | -0.17 (0.07) | -0.90 (0.07)        | -0.92 (0.07)        |
| Difference vs. placebo                                            |              | -0.73 (0.10)        | -0.75 (0.10)        |
| 95% CI                                                            |              | -0.94,-0.53         | -0.96,-0.55         |
| p-value                                                           |              | <0.001              | <0.001              |
| Patients with eGFR $\geq$ 60 to <90 ml/min/1.73m <sup>2</sup> , n | 109          | 114                 | 105                 |
| Change from baseline in HbA <sub>1c</sub> (%)                     | -0.23 (0.07) | -0.81 (0.07)        | -0.68 (0.07)        |
| Difference vs. placebo                                            |              | -0.58 (0.10)        | -0.45 (0.10)        |
| 95% CI                                                            |              | -0.76,-0.39         | -0.64,-0.26         |
| p-value                                                           |              | <0.001              | <0.001              |
| Patients with eGFR $\geq$ 30 to <60 ml/min/1.73m <sup>2</sup> , n | 22           | 19                  | 17                  |
| Change from baseline in HbA <sub>1c</sub> (%)                     | 0.15 (0.15)  | -0.44 (0.16)        | -0.48 (0.17)        |
| Difference vs. placebo                                            |              | -0.58 (0.22)        | -0.63 (0.23)        |
| 95% CI                                                            |              | -1.02,-0.14         | -1.08,-0.18         |
| p-value                                                           |              | 0.009               | 0.006               |

Change from baseline values are adjusted mean (SE). Values are from the full analysis set (FAS) using last observation carried forward (LOCF). CI=confidence interval.

SUPPLEMENTARY DATA

**Supplementary Table 3.** Changes in body weight and waist circumference.

|                                                                     | Placebo      | Empagliflozin<br>10 mg | Empagliflozin<br>25 mg | Open-label<br>empagliflozin<br>25 mg<br>(baseline<br>HbA <sub>1c</sub> >10%) |
|---------------------------------------------------------------------|--------------|------------------------|------------------------|------------------------------------------------------------------------------|
| Key secondary endpoint                                              |              |                        |                        |                                                                              |
| Body weight at week 24 (kg)                                         | 75.86 (1.12) | 74.91 (1.22)           | 75.10 (1.26)           | 75.99 (2.23)                                                                 |
| Change from baseline in body weight (kg)                            | -0.39 (0.15) | -2.16 (0.15)           | -2.39 (0.16)           | -1.76 (0.40)                                                                 |
| Difference vs. placebo                                              |              | -1.76 (0.22)           | -1.99 (0.22)           |                                                                              |
| 95% CI                                                              |              | -2.19, -1.34           | -2.42, -1.56           |                                                                              |
| p-value                                                             |              | <0.001                 | <0.001                 |                                                                              |
| Exploratory endpoints                                               |              |                        |                        |                                                                              |
| Patients with >5% reduction from baseline in body weight at week 24 | 13 (5.8%)    | 62 (27.6%)             | 51 (23.6%)             | 19 (18.8%)                                                                   |
| Odds ratio vs. placebo                                              |              | 6.36                   | 5.19                   |                                                                              |
| 95% CI                                                              |              | 3.36, 12.02            | 2.72, 9.91             |                                                                              |
| p-value                                                             |              | <0.001                 | <0.001                 |                                                                              |
| Waist circumference at week 24 (cm)                                 | 95.40 (0.87) | 95.21 (0.89)           | 95.34 (0.93)           | 97.60 (1.75)                                                                 |
| Change from baseline in waist circumference (cm)                    | -0.31 (0.28) | -1.46 (0.27)           | -1.48 (0.28)           | -1.36 (0.54)                                                                 |
| Difference vs. placebo                                              |              | -1.15 (0.39)           | -1.17 (0.39)           |                                                                              |
| 95% CI                                                              |              | -1.92, -0.39           | -1.94, -0.40           |                                                                              |
| p-value                                                             |              | 0.003                  | 0.003                  |                                                                              |

Data are n (%) or mean (SE) except for change from baseline values in randomized groups, which are adjusted mean (SE). Values are from the full analysis set (FAS) using last observation carried forward (LOCF) and from the open-label set using observed cases (OC). Patients with >5% reduction from baseline in body weight at week 24 analyzed in the FAS using non-completers considered failures (NCF) approach. CI=confidence interval.

SUPPLEMENTARY DATA

**Supplementary Table 4.** Changes in BP.

|                                       | Placebo        | Empagliflozin<br>10 mg | Empagliflozin<br>25 mg | Open-label<br>empagliflozin<br>25 mg<br>(baseline<br>HbA <sub>1c</sub> >10%) |
|---------------------------------------|----------------|------------------------|------------------------|------------------------------------------------------------------------------|
| SBP at week 24 (mmHg)                 | 127.4<br>(0.9) | 124.7 (1.0)            | 125.7 (0.8)            | 122.0 (1.7)                                                                  |
| Change from baseline in<br>SBP (mmHg) | -1.4<br>(0.7)  | -4.1 (0.7)             | -3.5 (0.7)             | -4.3 (1.2)                                                                   |
| Difference vs. placebo                |                | -2.7 (1.0)             | -2.1 (1.0)             |                                                                              |
| 95% CI                                |                | -4.6, -0.8             | -4.0, -0.2             |                                                                              |
| p-value                               |                | 0.005                  | 0.032                  |                                                                              |
| DBP at week 24 (mmHg)                 | 76.6<br>(0.6)  | 76.3 (0.6)             | 76.7 (0.5)             | 75.4 (1.2)                                                                   |
| Change from baseline in<br>DBP (mmHg) | -1.8<br>(0.4)  | -2.1 (0.4)             | -2.2 (0.4)             | -3.4 (1.0)                                                                   |
| Difference vs. placebo                |                | -0.4 (0.6)             | -0.4 (0.6)             |                                                                              |
| 95% CI                                |                | -1.6, 0.9              | -1.6, 0.8              |                                                                              |
| p-value                               |                | 0.557                  | 0.534                  |                                                                              |

Data are n (%) or mean (SE) except for change from baseline values in randomized groups, which are adjusted mean (SE). Values are from the full analysis set (FAS) using last observation carried forward (LOCF) and from the open-label set using observed cases (OC).

SUPPLEMENTARY DATA

**Supplementary Table 5.** Laboratory measurements.

|                                         | Placebo     |                       | Empagliflozin 10 mg |                       | Empagliflozin 25 mg |                       | Open-label empagliflozin 25 mg (baseline HbA <sub>1c</sub> >10%) |                       |
|-----------------------------------------|-------------|-----------------------|---------------------|-----------------------|---------------------|-----------------------|------------------------------------------------------------------|-----------------------|
|                                         | Baseline    | Change from baseline* | Baseline            | Change from baseline* | Baseline            | Change from baseline* | Baseline                                                         | Change from baseline* |
| Hematocrit (%) <sup>†</sup>             | 41.7 (4.3)  | -0.8 (3.1)            | 41.8 (5.0)          | 2.5 (3.4)             | 42.2 (4.1)          | 2.7 (3.4)             | 43.4 (4.9)                                                       | 1.2 (3.4)             |
| Uric acid (μmol/L) <sup>†</sup>         | 307 (110)   | 11 (81)               | 314 (127)           | -28 (87)              | 298 (115)           | -26 (81)              | 269 (113)                                                        | 14 (74)               |
| eGFR (mL/min/1.73m <sup>2</sup> [MDRD]) | 86.9 (20.1) | -1.9 (10.1)           | 86.4 (21.7)         | -1.3 (10.6)           | 88.4 (22.7)         | -2.5 (13.4)           | 93.1 (23.7)                                                      | -4.1 (13.3)           |
| Electrolytes (mmol/L) <sup>†</sup>      |             |                       |                     |                       |                     |                       |                                                                  |                       |
| Sodium                                  | 141 (2)     | 0 (2)                 | 141 (2)             | 0 (1)                 | 141 (2)             | 0 (2)                 | 140 (1)                                                          | 1 (1)                 |
| Potassium                               | 4.2 (0.3)   | 0.0 (0.3)             | 4.2 (0.3)           | -0.1 (0.3)            | 4.1 (0.3)           | 0.0 (0.3)             | 4.2 (0.3)                                                        | -0.1 (0.3)            |
| Calcium                                 | 2.4 (0.1)   | 0.0 (0.1)             | 2.5 (0.1)           | 0.0 (0.1)             | 2.4 (0.1)           | 0.0 (0.1)             | 2.4 (0.1)                                                        | 0.0 (0.1)             |
| Magnesium                               | 0.9 (0.1)   | 0.0 (0.1)             | 0.9 (0.1)           | 0.1 (0.1)             | 0.9 (0.1)           | 0.1 (0.1)             | 0.9 (0.1)                                                        | 0.1 (0.1)             |
| Phosphate                               | 1.2 (0.1)   | 0.0 (0.1)             | 1.2 (0.1)           | 0.0 (0.1)             | 1.2 (0.1)           | 0.0 (0.1)             | 1.2 (0.1)                                                        | 0.1 (0.1)             |
| Total cholesterol (mmol/L) <sup>‡</sup> | 4.40 (0.07) | 0.03 (0.04)           | 4.42 (0.06)         | 0.08 (0.04)           | 4.50 (0.07)         | 0.20 (0.05)           | 4.63 (0.12)                                                      | 0.03 (0.10)           |
| Difference vs. placebo                  |             |                       |                     | 0.06 (0.06)           |                     | 0.17 (0.06)           |                                                                  |                       |
| p-value                                 |             |                       |                     | 0.377                 |                     | 0.007                 |                                                                  |                       |
| HDL-cholesterol (mmol/L) <sup>‡</sup>   | 1.25 (0.02) | -0.02 (0.01)          | 1.26 (0.02)         | 0.05 (0.01)           | 1.27 (0.02)         | 0.05 (0.01)           | 1.26 (0.03)                                                      | -0.02 (0.02)          |
| Difference vs. placebo                  |             |                       |                     | 0.06 (0.02)           |                     | 0.07 (0.02)           |                                                                  |                       |
| p-value                                 |             |                       |                     | p<0.001               |                     | p<0.001               |                                                                  |                       |
| LDL-cholesterol (mmol/L) <sup>‡</sup>   | 2.39 (0.06) | 0.02 (0.04)           | 2.35 (0.06)         | 0.04 (0.04)           | 2.41 (0.06)         | 0.10 (0.04)           | 2.60 (0.11)                                                      | -0.06 (0.08)          |
| Difference vs. placebo                  |             |                       |                     | 0.01 (0.05)           |                     | 0.08 (0.05)           |                                                                  |                       |
| p-value                                 |             |                       |                     | 0.807                 |                     | 0.131                 |                                                                  |                       |
| Triglycerides (mmol/L) <sup>‡</sup>     | 1.70 (0.09) | 0.08 (0.09)           | 1.87 (0.09)         | 0.03 (0.09)           | 1.82 (0.07)         | 0.17 (0.09)           | 1.83 (0.12)                                                      | 0.37 (0.31)           |
| Difference vs. placebo                  |             |                       |                     | -0.05 (0.12)          |                     | 0.09 (0.12)           |                                                                  |                       |
| p-value                                 |             |                       |                     | 0.672                 |                     | 0.459                 |                                                                  |                       |

Data are mean (SD) unless otherwise indicated. MDRD, Modification of Diet in Renal Disease. Treated set (all patients treated with ≥1 dose of study drug). \*Change from baseline

SUPPLEMENTARY DATA

at last value on treatment for hematocrit, uric acid and electrolytes; change from baseline at week 24 for eGFR and cholesterol. †Normalized to a standard reference range. ‡Baseline data are mean (SE), change from baseline data are adjusted mean (SE) for randomized groups (ANCOVA, treated set, LOCF-IR) and mean (SE) for open-label group.

**Supplementary Figure 1.** (A) Percentage of patients in randomized groups with HbA1c  $\geq 7.0\%$  at baseline who reached HbA1c  $< 7.0\%$  at week 24 (logistic regression, FAS, non-completers considered failures [NCF] imputation); (B) change in FPG over time in randomized groups (MMRM, FAS, OC); (C) change from baseline in FPG at week 24 in randomized groups (ANCOVA, FAS, LOCF); (D) change from baseline in 2-hour PPG at week 24 in randomized groups (ANCOVA on patients in the FAS with a baseline and  $\geq 1$  on-treatment meal tolerance test measurement, LOCF). Data are adjusted mean (SE) for randomized groups, or percentage of patients. \* $p < 0.001$  vs placebo; † $p = 0.003$  vs placebo.

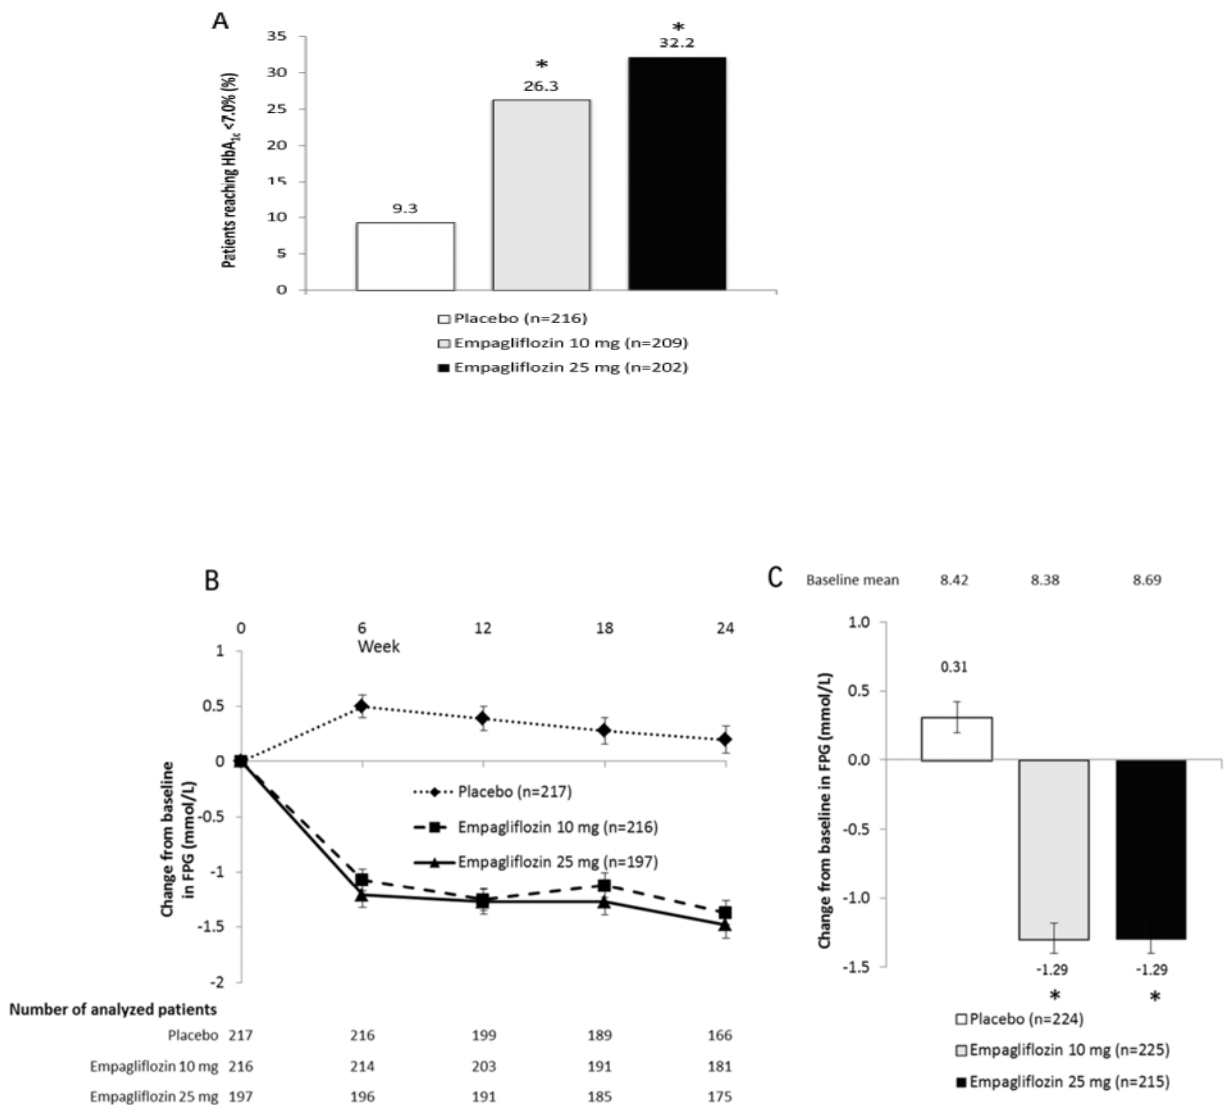

SUPPLEMENTARY DATA

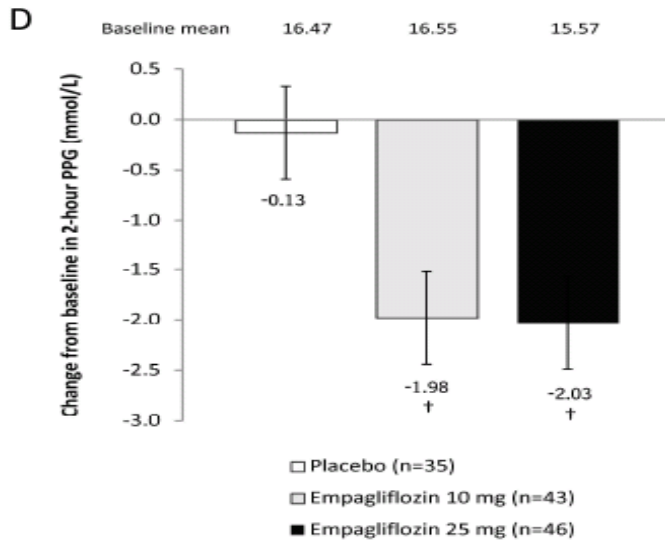

**Supplementary Figure 2.** (A) percentage of patients with >5% reduction in body weight at week 24 (logistic regression, FAS, non-completers considered failures imputation); (B) Change from baseline in waist circumference at week 24 (ANCOVA, FAS, LOCF). Data are adjusted mean (SE) or % of patients. \*p<0.001 vs placebo; †p=0.003 vs placebo.

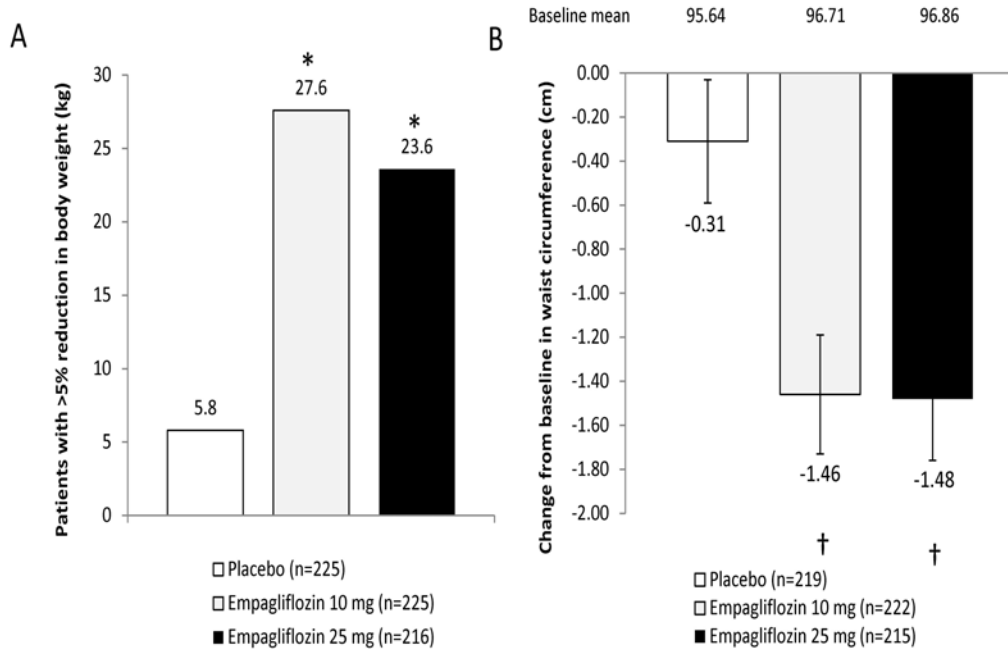



SUPPLEMENTARY DATA

**Supplementary Figure 3.** Change in blood pressure over time. (A) SBP (mixed model repeated measures [MMRM], full analysis set [FAS], observed cases [OC]); (B) DBP (MMRM, FAS, OC). Data are adjusted mean (SE).

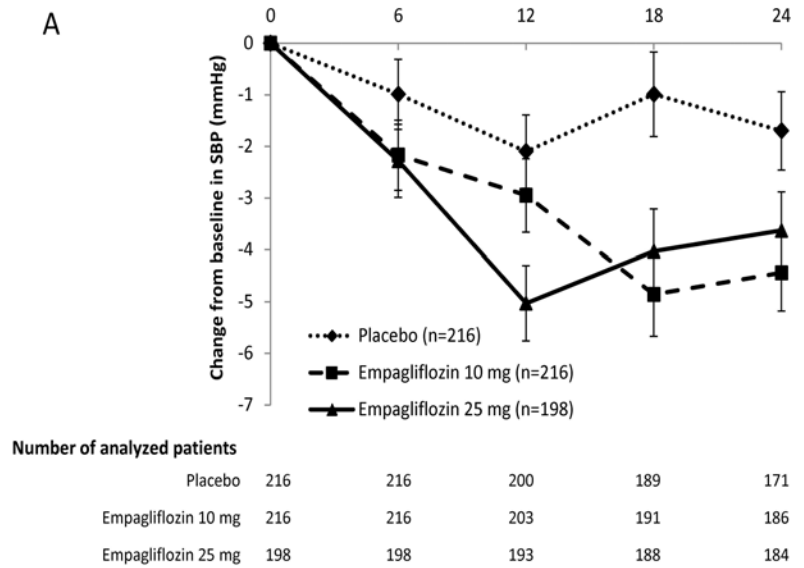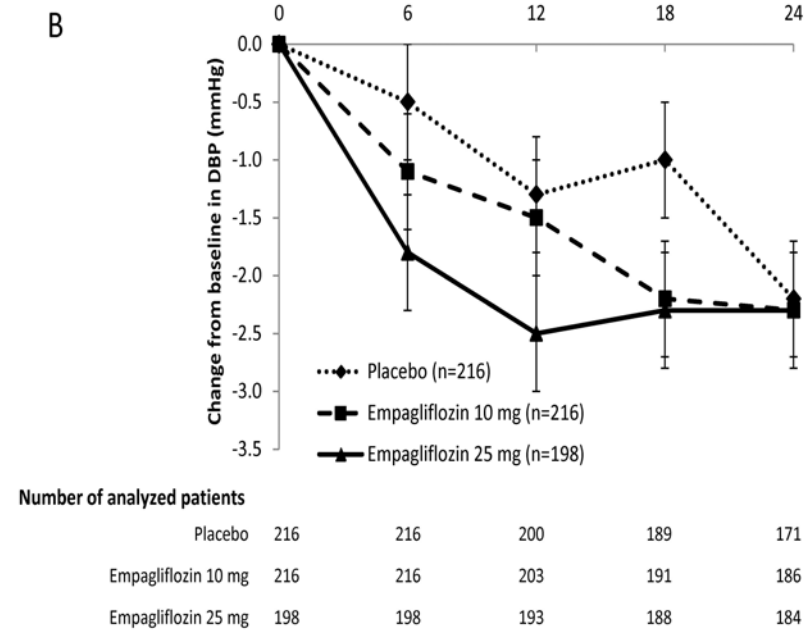

Supplement: supp_dc12-2673v122673_DC122673SupplementaryData.pdf [file supp_dc12-2673v122673_DC122673SupplementaryData.pdf]
